# Supplementary material for: Genomic landscapes by multiregion sequencing combined with circulation tumor DNA detection contribute to molecular diagnosis in glioblastomas
Source: publisher site journal article supplement (doi:10.18632/aging.102526), 2019-12-10
Supplement: Supplementary file [file aging-v11i23-102526-supplementary-material-SD2.pdf]

## SUPPLEMENTARY TABLE

Supplementary Table 1. Clinical data for the tumor samples

| <b>ID</b>       | <b>Age</b> | <b>Gender</b> | <b>Sample type</b> | <b>Number of samples</b> |
|-----------------|------------|---------------|--------------------|--------------------------|
| NO.01           | 62         | male          | rGBM               | 3                        |
| NO.02           | 56         | female        | GBM                | 1                        |
| NO.03           | 51         | female        | GBM                | 1                        |
| NO.04           | 66         | male          | GBM                | 5                        |
| NO.05           | 45         | male          | GBM                | 4                        |
| NO.05-recurrent | 46         | male          | rGBM               | 5                        |
| NO.06           | 19         | male          | GBM                | 1                        |
| NO.07           | 32         | male          | GBM                | 4                        |
| NO.08           | 62         | male          | GBM                | 1                        |
| NO.09           | 70         | male          | GBM                | 4                        |
| NO.10           | 61         | male          | GBM                | 1                        |
| NO.11           | 64         | male          | GBM                | 1                        |
